# Supplementary material for: Comparison of Leishmania killicki (syn. L. tropica) and Leishmania tropica Population Structure in Maghreb by Microsatellite Typing
Source: PLoS Negl Trop Dis. 2015 Dec 8;9(12):e0004204. doi: 10.1371/journal.pntd.0004204 (PMC4672892; doi:10.1371/journal.pntd.0004204)
Supplement: S3 Table — (XLS) [file pntd.0004204.s004.xls]

## Sheet: Feuil2
Table 1. Characteristics of the 198 samples analyzed in this study
Taxon	Laboratory code	WHO code	Host	Country	Locality	Period of isolation	Zymodeme
L. killicki	LEM95	MHOM/TU/79/LEM95	Homo sapiens	Tunisia	TATAOUINE	[1980, 1989]	MON-8
	LEM153	MHOM/TN/80/LEM153	Homo sapiens	Tunisia	TATAOUINE	[1980, 1989]	MON-8
	LEM160	MHOM/TN/80/LEM160	Homo sapiens	Tunisia	TATAOUINE	[1980, 1989]	MON-8
	LEM161	MHOM/TU/80/LEM161	Homo sapiens	Tunisia	TATAOUINE	[1980, 1989]	MON-8
	LEM162	MHOM/TN/80/LEM162	Homo sapiens	Tunisia	TATAOUINE	[1980, 1989]	MON-8
	LEM163	MHOM/TN/80/LEM163	Homo sapiens	Tunisia	TATAOUINE	[1980, 1989]	MON-8
	LEM169	MHOM/TN/80/LEM169	Homo sapiens	Tunisia	TATAOUINE	[1980, 1989]	MON-8
	LEM170	MHOM/TN/80/LEM170	Homo sapiens	Tunisia	TATAOUINE	[1980, 1989]	MON-8
	LEM171	MHOM/TN/80/LEM171	Homo sapiens	Tunisia	TATAOUINE	[1980, 1989]	MON-8
	LEM172	MHOM/TN/80/LEM172	Homo sapiens	Tunisia	TATAOUINE	[1980, 1989]	MON-8
	LEM173	MHOM/TN/80/LEM173	Homo sapiens	Tunisia	TATAOUINE	[1980, 1989]	MON-8
	LEM174	MHOM/TN/80/LEM174	Homo sapiens	Tunisia	TATAOUINE	[1980, 1989]	MON-8
	LEM175	MHOM/TN/80/LEM175	Homo sapiens	Tunisia	TATAOUINE	[1980, 1989]	MON-8
	LEM176	MHOM/TN/80/LEM176	Homo sapiens	Tunisia	TATAOUINE	[1980, 1989]	MON-8
	LEM177	MHOM/TN/80/LEM177	Homo sapiens	Tunisia	TATAOUINE	[1980, 1989]	MON-8
	LEM178	MHOM/TN/80/LEM178	Homo sapiens	Tunisia	TATAOUINE	[1980, 1989]	MON-8
	LEM179	MHOM/TN/80/LEM179	Homo sapiens	Tunisia	TATAOUINE	[1980, 1989]	MON-8
	LEM180	MHOM/TN/80/LEM180	Homo sapiens	Tunisia	TATAOUINE	[1980, 1989]	MON-8
	LEM181	MHOM/TN/80/LEM181	Homo sapiens	Tunisia	TATAOUINE	[1980, 1989]	MON-8
	LEM182	MHOM/TN/80/LEM182	Homo sapiens	Tunisia	TATAOUINE	[1980, 1989]	MON-8
	LEM183	MHOM/TN/80/LEM183	Homo sapiens	Tunisia	TATAOUINE	[1980, 1989]	MON-8
	LEM184	MHOM/TN/80/LEM184	Homo sapiens	Tunisia	TATAOUINE	[1980, 1989]	MON-8
	LEM185	MHOM/TN/80/LEM185	Homo sapiens	Tunisia	TATAOUINE	[1980, 1989]	MON-8
	LEM186	MHOM/TN/80/LEM186	Homo sapiens	Tunisia	TATAOUINE	[1980, 1989]	MON-8
	LEM193	MHOM/TN/80/LEM193	Homo sapiens	Tunisia	TATAOUINE	[1980, 1989]	MON-8
	LEM194	MHOM/TN/80/LEM194	Homo sapiens	Tunisia	TATAOUINE	[1980, 1989]	MON-8
	LEM195	MHOM/TN/80/LEM195	Homo sapiens	Tunisia	TATAOUINE	[1980, 1989]	MON-8
	LEM2577	MHOM/TN/92/LSL16	Homo sapiens	Tunisia	TATAOUINE	[1990, 1999]	MON-8
	LEM4390	MHOM/TN/2002/LSL65	Homo sapiens	Tunisia	TATAOUINE	[2000, 2009]	MON-8
	LEM4741	MHOM/TN/2004/CRE139	Homo sapiens	Tunisia	TATAOUINE	[2000, 2009]	MON-8
	LEM4788	MHOM/TN/2004/HIA83	Homo sapiens	Tunisia	TATAOUINE	[2000, 2009]	MON-8
	LEM4878	MHOM/TN/2004/CRE145	Homo sapiens	Tunisia	TATAOUINE	[2000, 2009]	MON-8
	LEM4982	MHOM/TN/2005/LSL88	Homo sapiens	Tunisia	TATAOUINE	[2000, 2009]	MON-8
	LEM5420	MHOM/TN/2007/LPN306	Homo sapiens	Tunisia	TATAOUINE	[2000, 2009]	MON-8
	LEM5880	MHOM/TN/2009/MET122	Homo sapiens	Tunisia	GAFSA	[2000, 2009]	MON-317
	LEM6172	MHOM/TN/2010/MET112	Homo sapiens	Tunisia	GAFSA	[2010, 2013]	MON-8
	LEM6173	MHOM/TN/2010/MET300	Homo sapiens	Tunisia	GAFSA	[2010, 2013]	MON-317
	LEM6174	MHOM/TN/2010/MET301	Homo sapiens	Tunisia	GAFSA	[2010, 2013]	MON-317
	LEM6175	MHOM/TN/2010/MET315	Homo sapiens	Tunisia	GAFSA	[2010, 2013]	MON-8
	LEM6176	MHOM/TN/2010/MET318	Homo sapiens	Tunisia	GAFSA	[2010, 2013]	MON-8
	LEM6177	MHOM/TN/2010/MET324	Homo sapiens	Tunisia	GAFSA	[2010, 2013]	MON-8
	LEM6226	MHOM/TN/2004/PLC3	Homo sapiens	Tunisia	TATAOUINE	[2000, 2009]	MON-8
	LEM6227	MHOM/TN/2005/PLC5	Homo sapiens	Libya	Libya	[2000, 2009]	MON-8
	LEM6228	MHOM/TN/2003/LC39	Homo sapiens	Tunisia	KAIROUAN - SELIANA	[2000, 2009]	MON-8
	LEM6229	MHOM/TN/2006/SSC36	Homo sapiens	Tunisia	KAIROUAN - SELIANA	[2000, 2009]	MON-8
	LEM6230	MHOM/TN/2006/SSC37	Homo sapiens	Tunisia	TATAOUINE	[2000, 2009]	MON-8
	LEM6231	MHOM/TN/2005/LC24	Homo sapiens	Tunisia	TATAOUINE	[2000, 2009]	MON-8
	LEM6423	MHOM/TN/2012/NAS12	Homo sapiens	Tunisia	KAIROUAN - SELIANA	[2010, 2013]	MON-8
	LEM4989	MHOM/DZ/2005/LIPA10	Homo sapiens	Algeria	Algeria	[2000, 2009]	MON-301
	LEM4995	MHOM/DZ/2005/LIPA07	Homo sapiens	Algeria	Algeria	[2000, 2009]	MON-301
	LEM6404	MHOM/DZ/2005/LIPA11	Homo sapiens	Algeria	Algeria	[2000, 2009]	MON-301
	LEM6416	MHOM/DZ/2011/LIPA283	Homo sapiens	Algeria	Algeria	[2010, 2013]	MON-301
	LEM6418	MHOM/DZ/2005/LIPA14	Homo sapiens	Algeria	Algeria	[2000, 2009]	MON-301
	LEM6420	MHOM/DZ/2011/LIPA281	Homo sapiens	Algeria	Algeria	[2010, 2013]	MON-301
	LEM6421	MHOM/DZ/2011/LIPA281	Homo sapiens	Algeria	Algeria	[2010, 2013]	MON-301
	G1732	Not available	Homo sapiens	Tunisia	GAFSA	[2010, 2013]	Not identified
	G2034	Not available	Homo sapiens	Tunisia	GAFSA	[2010, 2013]	Not identified
	G439	Not available	Homo sapiens	Tunisia	GAFSA	[2010, 2013]	Not identified
	M118	Not available	Homo sapiens	Tunisia	GAFSA	[2010, 2013]	Not identified
	M136	Not available	Homo sapiens	Tunisia	GAFSA	[2010, 2013]	Not identified
	M18	Not available	Homo sapiens	Tunisia	GAFSA	[2000, 2009]	Not identified
	M180	Not available	Homo sapiens	Tunisia	GAFSA	[2010, 2013]	Not identified
	M187	Not available	Homo sapiens	Tunisia	GAFSA	[2010, 2013]	Not identified
	M200	Not available	Homo sapiens	Tunisia	GAFSA	[2010, 2013]	Not identified
	M208	Not available	Homo sapiens	Tunisia	GAFSA	[2010, 2013]	Not identified
	M32	Not available	Homo sapiens	Tunisia	GAFSA	[2000, 2009]	Not identified
	M33	Not available	Homo sapiens	Tunisia	GAFSA	[2000, 2009]	Not identified
	G436	Not available	Homo sapiens	Tunisia	GAFSA	[2010, 2013]	Not identified
	M54	Not available	Homo sapiens	Tunisia	GAFSA	[2000, 2009]	Not identified
	M59	Not available	Homo sapiens	Tunisia	GAFSA	[2000, 2009]	Not identified
	M62	Not available	Homo sapiens	Tunisia	GAFSA	[2000, 2009]	Not identified
	M76	Not available	Homo sapiens	Tunisia	GAFSA	[2000, 2009]	Not identified
	M78	Not available	Homo sapiens	Tunisia	GAFSA	[2000, 2009]	Not identified
	G2034	Not available	Homo sapiens	Tunisia	GAFSA	[2010, 2013]	Not identified
	G2288	Not available	Homo sapiens	Tunisia	GAFSA	[2010, 2013]	Not identified
	G2407	Not available	Homo sapiens	Tunisia	GAFSA	[2010, 2013]	Not identified
	G2434	Not available	Homo sapiens	Tunisia	GAFSA	[2010, 2013]	Not identified
	G2438	Not available	Homo sapiens	Tunisia	GAFSA	[2010, 2013]	Not identified
	G2482	Not available	Homo sapiens	Tunisia	GAFSA	[2010, 2013]	Not identified
	G2939	Not available	Homo sapiens	Tunisia	GAFSA	[2010, 2013]	Not identified
	G3473	Not available	Homo sapiens	Tunisia	GAFSA	[2010, 2013]	Not identified
	G3609	Not available	Homo sapiens	Tunisia	GAFSA	[2010, 2013]	Not identified
	Gondi2	Not available	Ctenodactulus gundi	Tunisia	GAFSA	[2000, 2009]	Not identified
	Gondi4	Not available	Ctenodactulus gundi	Tunisia	GAFSA	[2000, 2009]	Not identified
	Phléb	Not available	Phlebotomus sergenti	Tunisia	GAFSA	[2010, 2013]	Not identified
L. tropica	LEM1314	MHOM/MA/88/LEM1314	Homo sapiens	Morocco	AZILAL	[1980, 1989]	MON-109
	LEM1452	MHOM/MA/88/LEM1452	Homo sapiens	Morocco	AZILAL	[1980, 1989]	MON-107
	LEM1591	MHOM/MA/89/LEM1591	Homo sapiens	Morocco	AZILAL	[1980, 1989]	MON-109
	LEM1610	MHOM/MA/89/LEM1610	Homo sapiens	Morocco	AZILAL	[1980, 1989]	MON-102
	LEM1621	MHOM/MA/89/LEM1621	Homo sapiens	Morocco	AZILAL	[1980, 1989]	MON-109
	LEM1622	MHOM/MA/89/LEM1622	Homo sapiens	Morocco	OUARZAZATE	[1980, 1989]	MON-102
	LEM1623	MHOM/MA/89/LEM1623	Homo sapiens	Morocco	OUARZAZATE	[1980, 1989]	MON-102
	LEM1624	MHOM/MA/89/LEM1624	Homo sapiens	Morocco	AZILAL	[1980, 1989]	MON-102
	LEM1663	MHOM/MA/89/LEM1663	Homo sapiens	Morocco	AZILAL	[1980, 1989]	MON-102
	LEM1665	MHOM/MA/89/LEM1665	Homo sapiens	Morocco	AZILAL	[1980, 1989]	MON-102
	LEM1666	MHOM/MA/89/LEM1666	Homo sapiens	Morocco	OUARZAZATE	[1980, 1989]	MON-102
	LEM1670	MHOM/MA/89/LEM1670	Homo sapiens	Morocco	OUARZAZATE	[1980, 1989]	MON-102
	LEM1777	MHOM/MA/89/LEM1777	Homo sapiens	Morocco	ESSAOUIRA	[1980, 1989]	MON-113
	LEM1778	MHOM/MA/89/LEM1778	Homo sapiens	Morocco	ESSAOUIRA	[1980, 1989]	MON-113
	LEM1779	MHOM/MA/98/LEM1779	Homo sapiens	Morocco	ESSAOUIRA	[1980, 1989]	MON-113
	LEM1780	MHOM/MA/89/LEM1780	Homo sapiens	Morocco	ESSAOUIRA	[1980, 1989]	MON-102
	LEM1781	MHOM/MA/89/LEM1781	Homo sapiens	Morocco	AZILAL	[1980, 1989]	MON-102
	LEM1782	MHOM/MA/89/LEM1782	Homo sapiens	Morocco	AZILAL	[1980, 1989]	MON-102
	LEM2010	MHOM/MA/90/LEM2010	Homo sapiens	Morocco	ESSAOUIRA	[1990, 1999]	MON-113
	LEM2011	MHOM/MA/90/LEM2011	Homo sapiens	Morocco	ESSAOUIRA	[1990, 1999]	MON-113
	LEM2012	MHOM/MA/90/LEM2012	Homo sapiens	Morocco	ESSAOUIRA	[1990, 1999]	MON-113
	LEM2013	MHOM/MA/90/LEM2013	Homo sapiens	Morocco	ESSAOUIRA	[1990, 1999]	MON-102
	LEM2014	MHOM/MA/90/LEM2014	Homo sapiens	Morocco	ESSAOUIRA	[1990, 1999]	MON-102
	LEM2015	MHOM/MA/90/LEM2015	Homo sapiens	Morocco	ESSAOUIRA	[1990, 1999]	MON-102
	LEM2016	MHOM/MA/90/LEM2016	Homo sapiens	Morocco	AZILAL	[1990, 1999]	MON-102
	LEM2017	MHOM/MA/90/LEM2017	Homo sapiens	Morocco	AZILAL	[1990, 1999]	MON-102
	LEM2018	MHOM/MA/90/LEM2018	Homo sapiens	Morocco	AZILAL	[1990, 1999]	MON-102
	LEM2019	MHOM/MA/90/LEM2019	Homo sapiens	Morocco	AZILAL	[1990, 1999]	MON-102
	LEM2020	MHOM/MA/90/LEM2020	Homo sapiens	Morocco	AZILAL	[1990, 1999]	MON-102
	LEM2021	MHOM/MA/90/LEM2021	Homo sapiens	Morocco	Azilal	[1990, 1999]	MON-102
	LEM2022	MHOM/MA/90/LEM2022	Homo sapiens	Morocco	AZILAL	[1990, 1999]	MON-102
	LEM2027	MHOM/MA/90/LEM2027	Homo sapiens	Morocco	AZILAL	[1990, 1999]	MON-102
	LEM3015	MHOM/MA/95/LEM3015	Homo sapiens	Morocco	OUARZAZATE	[1990, 1999]	MON-264
	LEM3856	MHOM/MA/95/UERL10	Homo sapiens	Morocco	TAZA	[1990, 1999]	MON-102
	LEM3857	MHOM/MA/95/UERL11	Homo sapiens	Morocco	TAZA	[1990, 1999]	MON-102
	LEM3859	MHOM/MA/96/UERL181	Homo sapiens	Morocco	TAZA	[1990, 1999]	MON-102
	LEM3876	MHOM/MA/96/UERL128	Homo sapiens	Morocco	TAZA	[1990, 1999]	MON-102
	LEM3913	MHOM/MA/95/UERL9	Homo sapiens	Morocco	TAZA	[1990, 1999]	MON-102
	LEM3914	MHOM/MA/95/UERL25	Homo sapiens	Morocco	TAZA	[1990, 1999]	MON-102
	LEM3915	MHOM/MA/96/UERL137	Homo sapiens	Morocco	TAZA	[1990, 1999]	MON-102
	LEM5274	MHOM/MA/2000/INHW05	Homo sapiens	Morocco	ESSAOUIRA	[2000, 2009]	MON-102
	LEM5275	MHOM/MA/2000/INHW07	Homo sapiens	Morocco	ESSAOUIRA	[2000, 2009]	MON-102
	LEM5276	MHOM/MA/2000/INHW02	Homo sapiens	Morocco	ESSAOUIRA	[2000, 2009]	MON-102
	LEM5277	MHOM/MA/2000/INHW10	Homo sapiens	Morocco	ESSAOUIRA	[2000, 2009]	MON-113
	LEM5278	MHOM/MA/2000/INHW13	Homo sapiens	Morocco	ESSAOUIRA	[2000, 2009]	MON-113
	LEM5279	MHOM/MA/2000/INHW19	Homo sapiens	Morocco	ESSAOUIRA	[2000, 2009]	MON-113
	LEM5281	MHOM/MA/2000/INHW17	Homo sapiens	Morocco	ESSAOUIRA	[2000, 2009]	MON-113
	LEM5283	MHOM/MA/2000/INHW19	Homo sapiens	Morocco	ESSAOUIRA	[2000, 2009]	MON-113
	LEM5290	MHOM/MA/2000/INHW09	Homo sapiens	Morocco	ESSAOUIRA	[2000, 2009]	MON-113
	LEM5291	MHOM/MA/2000/INHW08	Homo sapiens	Morocco	ESSAOUIRA	[2000, 2009]	MON-113
	LEM5295	MHOM/MA/2000/INHW20	Homo sapiens	Morocco	ESSAOUIRA	[2000, 2009]	MON-113
	LEM5497	MHOM/MA/2007/INHS1	Homo sapiens	Morocco	AZILAL	[2000, 2009]	MON-102
	LEM5498	MHOM/MA/2007/INHS2	Homo sapiens	Morocco	AZILAL	[2000, 2009]	MON-102
	LEM5499	MHOM/MA/2007/INHS3	Homo sapiens	Morocco	AZILAL	[2000, 2009]	MON-102
	LEM5500	MHOM/MA/2007/INHS4	Homo sapiens	Morocco	AZILAL	[2000, 2009]	MON-102
	LEM5501	MHOM/MA/2007/INHS5	Homo sapiens	Morocco	AZILAL	[2000, 2009]	MON-102
	LEM5502	MHOM/MA/2007/INHS6	Homo sapiens	Morocco	AZILAL	[2000, 2009]	MON-102
	LEM5503	MHOM/MA/2007/INHS7	Homo sapiens	Morocco	AZILAL	[2000, 2009]	MON-102
	LEM5504	MHOM/MA/2007/INHS8	Homo sapiens	Morocco	AZILAL	[2000, 2009]	MON-102
	LEM5505	MHOM/MA/2007/INHS9	Homo sapiens	Morocco	AZILAL	[2000, 2009]	MON-102
	LEM5506	MHOM/MA/2007/INHS10	Homo sapiens	Morocco	AZILAL	[2000, 2009]	MON-102
	LEM5950	MHOM/MA/2008/W38	Homo sapiens	Morocco	TAZA	[2000, 2009]	MON-107
	LEM1467	MHOM/MA/88/LEM1467	Homo sapiens	Morocco	AZILAL	[1980, 1989]	MON-102
	LEM1595	MHOM/MA/89/LEM1595	Homo sapiens	Morocco	AZILAL	[1980, 1989]	MON-102
	LEM1596	MHOM/MA/89/LEM1596	Homo sapiens	Morocco	ESSAOUIRA	[1980, 1989]	MON-102
	LEM1597	MHOM/MA/89/LEM1597	Homo sapiens	Morocco	ESSAOUIRA	[1980, 1989]	MON-102
	LEM1598	MHOM/MA/89/LEM1597	Homo sapiens	Morocco	ESSAOUIRA	[1980, 1989]	MON-102
	LEM1601	MHOM/MA/89/LEM1601	Homo sapiens	Morocco	AZILAL	[1980, 1989]	MON-102
	LEM1602	MHOM/MA/89/LEM1602	Homo sapiens	Morocco	AZILAL	[1980, 1989]	MON-102
	LEM1604	MHOM/MA/89/LEM1604	Homo sapiens	Morocco	ESSAOUIRA	[1980, 1989]	MON-102
	LEM1605	MHOM/MA/89/LEM1605	Homo sapiens	Morocco	ESSAOUIRA	[1980, 1989]	MON-102
	LEM1606	MHOM/MA/89/LEM1606	Homo sapiens	Morocco	AZILAL	[1980, 1989]	MON-102
	LEM1609	MHOM/MA/89/LEM1609	Homo sapiens	Morocco	AZILAL	[1980, 1989]	MON-112
	LEM1611	MHOM/MA/89/LEM1611	Homo sapiens	Morocco	AZILAL	[1980, 1989]	MON-102
	LEM1612	MHOM/MA/89/LEM1612	Homo sapiens	Morocco	ESSAOUIRA	[1980, 1989]	MON-112
	LEM1613	MHOM/MA/89/LEM1613	Homo sapiens	Morocco	AZILAL	[1980, 1989]	MON-107
	LEM1619	MHOM/MA/89/LEM1619	Homo sapiens	Morocco	AZILAL	[1980, 1989]	MON-102
	LEM1620	MHOM/MA/89/LEM1620	Homo sapiens	Morocco	AZILAL	[1980, 1989]	MON-102
	LEM1627	MHOM/MA/89/LEM1627	Homo sapiens	Morocco	ESSAOUIRA	[1980, 1989]	MON-102
	LEM1667	MHOM/MA/89/LEM1667	Homo sapiens	Morocco	ESSAOUIRA	[1980, 1989]	MON-102
	LEM1689	MHOM/MA/89/LEM1689	Homo sapiens	Morocco	ESSAOUIRA	[1980, 1989]	MON-102
	LEM2142	MHOM/MA/90/LEM2142	Homo sapiens	Morocco	ESSAOUIRA	[1990, 1999]	MON-113
	LEM2144	MHOM/MA/90/LEM2144	Homo sapiens	Morocco	ESSAOUIRA	[1990, 1999]	MON-113
	LEM2145	MHOM/MA/90/LEM2145	Homo sapiens	Morocco	ESSAOUIRA	[1990, 1999]	MON-113
	LEM2146	MHOM/MA/90/LEM2146	Homo sapiens	Morocco	ESSAOUIRA	[1990, 1999]	MON-113
	LEM2152	MHOM/MA/90/LEM2152	Homo sapiens	Morocco	ESSAOUIRA	[1990, 1999]	MON-102
	LEM2156	MHOM/MA/91/LEM2156	Homo sapiens	Morocco	ESSAOUIRA	[1990, 1999]	MON-107
	LEM2159	MHOM/MA/90/LEM2159	Homo sapiens	Morocco	ESSAOUIRA	[1990, 1999]	MON-107
	LEM2450	MHOM/MA/92/LPN79	Homo sapiens	Morocco	AZILAL	[1990, 1999]	MON-102
	LEM2571	MHOM/MA/93/LEM2571	Homo sapiens	Morocco	AZILAL	[1990, 1999]	MON-102
	LEM3858	MHOM/MA/96/UERL35	Homo sapiens	Morocco	TAZA	[1990, 1999]	MON-102
	LEM3916	MHOM/MA/96/UERL162	Homo sapiens	Morocco	Taza	[1990, 1999]	MON-102
	LEM5738	MHOM/MA/2008/INHJ12	Homo sapiens	Morocco	OUARZAZATE	[2000, 2009]	MON-311
	LEM5739	MHOM/MA/2008/INHJ13	Homo sapiens	Morocco	OUARZAZATE	[2000, 2009]	MON-107
	LEM5740	MHOM/MA/2008/INHJ14	Homo sapiens	Morocco	OUARZAZATE	[2000, 2009]	MON-109
	LEM5742	MHOM/MA/2008/INHDP19	Homo sapiens	Morocco	SALE	[2000, 2009]	MON-102
	LEM5743	MHOM/MA/2008/INHDP21	Homo sapiens	Morocco	SALE	[2000, 2009]	MON-102
	LEM5941	MHOM/MA/2008/W37	Homo sapiens	Morocco	AZILAL	[2000, 2009]	MON-107
	LEM5945	MHOM/MA/2009/W33	Homo sapiens	Morocco	AZILAL	[2000, 2009]	MON-113
	LEM1462	MHOM/MA/88/LEM1462	Homo sapiens	Morocco	AZILAL	[1980, 1989]	MON-102
	LEM1463	MHOM/MA/88/LEM1463	Homo sapiens	Morocco	AZILAL	[1980, 1989]	MON-102
	LEM1464	MHOM/MA/88/LEM1464	Homo sapiens	Morocco	AZILAL	[1980, 1989]	MON-102
	LEM1465	MHOM/MA/88/LEM1465	Homo sapiens	Morocco	AZILAL	[1980, 1989]	MON-102
	LEM1466	MHOM/MA/88/LEM1466	Homo sapiens	Morocco	AZILAL	[1980, 1989]	MON-102
	LEM1468	MHOM/MA/88/LEM1468	Homo sapiens	Morocco	AZILAL	[1980, 1989]	MON-102
	LEM1696	MHOM/MA/89/LEM1696	Homo sapiens	Morocco	AZILAL	[1980, 1989]	MON-102
	LEM1930	MHOM/MA/90/LEM1930	Homo sapiens	Morocco	AZILAL	[1990, 1999]	MON-102
	LEM2143	MHOM/MA/90/LEM2143	Homo sapiens	Morocco	ESSAOUIRA	[1990, 1999]	MON-102
	LEM3186	MHOM/MA/96/LCB8	Homo sapiens	Morocco	ESSAOUIRA	[1990, 1999]	MON-113
	LEM5280	MHOM/MA/2000/INHW16	Homo sapiens	Morocco	ESSAOUIRA	[2000, 2009]	MON-113
	LEM5507	MHOM/MA/2007/INHS11	Homo sapiens	Morocco	AZILAL	[2000, 2009]	MON-102
	LEM5508	MHOM/MA/2007/INHS12	Homo sapiens	Morocco	AZILAL	[2000, 2009]	MON-102
	LEM5741	MHOM/MA/2008/INHDP16	Homo sapiens	Morocco	SALE	[2000, 2009]	MON-311

## Sheet: Feuil3
Table 2. Characteristics and genetic diversity of the nine microsatellite loci in the 198 samples of L. killicki and L. tropica
Locus	GenBank Accession no.	T (°C)	N	Hs	Fis	Reference
GA1	AY826385	56	2	0.062	0.801	Schwenkenbecher et al., 2004
GA11	AY826391	54	5	0.438	0.738	Schwenkenbecher et al., 2004
GA6	AY826388	42	3	0.525	0.920	Schwenkenbecher et al., 2004
GM2	AY826393	50	2	0.336	0.828	Schwenkenbecher et al., 2004
GTG1	AY826394	56	3	0.301	0.446	Schwenkenbecher et al., 2004
GTG3	AY826395	54	3	0.092	0.465	Schwenkenbecher et al., 2004
LIST7027	AF427875	58	2	0.086	0.333	Jamjoom et al., 2002
LIST7036	AF427884	58	5	0.307	0.772	Jamjoom et al., 2002
LIST7040	AF427888	58	4	0.198	0.120	Jamjoom et al., 2002
Overall			3.22	0.261	0.664
T, Annealing temperature; N, alleles number; Hs, Nei's unbiased genetic diversity within samples; Fis, inbreeding coefficient

## Sheet: Feuil4
Table 3. Zymodeme of the 168 strains of L. killicki and L. tropica used in this study
Taxon	Country	Zymodeme (n = number of strains)	Number of strains
L. killicki	Tunisia	MON-8 (n = 44); MON-317 (n = 3)	47
	Algeria	MON-301	7
	Libya	MON-8	1
L. tropica	Morocco	MON-102 (n = 76) ; MON-107 (n = 6) ; MON-109 (n = 3) ; MON-112 (n = 3) ; MON-113 (n = 22) ; MON-264 (n = 1) ; MON-311 (n = 2)	113
Total			168

## Sheet: Feuil1
S3 Table. The genotypes of each sample at each locus
Sample code	Loci
	GA1	GA11	GA6	GM2	GTG1	GTG3	LIST7027	LIST7036	LIST7040
G1732	068-068	064-064	062-062	060-060	061-061	066-066	170-170	229-229	227-227
G2034	068-068	064-064	062-062	060-060	061-061	066-066	170-170	227-227	227-227
G439	068-068	064-064	062-062	060-060	061-061	066-066	170-170	227-227	227-227
LEM153	068-068	062-062	064-064	061-061	061-061	066-066	170-170	229-229	227-227
LEM160	068-068	062-064	064-064	060-061	061-061	066-066	170-170	229-229	227-227
LEM161	068-068	064-064	064-064	060-060	061-061	066-066	170-170	229-229	227-227
LEM162	068-068	062-062	064-064	060-060	061-061	066-066	170-170	229-229	227-227
LEM163	068-068	062-062	064-064	060-060	061-061	066-066	170-170	229-229	227-227
LEM169	068-068	060-060	064-064	061-061	061-061	066-066	170-170	229-229	227-227
LEM170	068-068	062-062	064-064	061-061	061-061	066-066	170-170	229-229	227-227
LEM171	068-068	064-064	062-062	061-061	061-061	066-066	170-170	229-229	227-227
LEM172	068-068	062-062	064-064	061-061	061-061	066-066	170-170	229-229	227-227
LEM173	068-068	062-062	064-064	061-061	061-061	066-066	170-170	229-229	227-227
LEM174	068-068	062-064	064-064	060-061	061-061	066-066	170-170	229-229	227-227
LEM175	068-068	062-064	064-064	060-060	061-061	066-066	170-170	229-229	227-227
LEM176	068-068	062-064	064-064	060-060	061-061	066-066	170-170	229-229	227-227
LEM177	068-068	062-064	064-064	060-060	061-061	066-066	170-170	229-229	227-227
LEM178	068-068	058-062	064-064	060-060	061-061	066-066	170-170	229-229	227-227
LEM179	068-068	064-064	064-064	060-061	061-061	066-066	170-170	229-229	227-227
LEM180	068-068	062-062	064-064	061-061	061-061	066-066	170-170	229-229	227-227
LEM181	068-068	062-064	064-064	061-061	061-061	066-066	170-170	229-229	227-227
LEM182	068-068	062-064	064-064	061-061	061-061	066-066	170-170	229-229	227-227
LEM183	068-068	062-062	064-064	061-061	061-061	066-066	170-170	227-227	227-227
LEM184	068-068	062-062	064-064	061-061	061-061	066-066	170-170	229-229	227-227
LEM185	068-068	062-064	064-064	061-061	061-061	066-066	170-170	229-229	227-227
LEM186	068-068	062-062	064-064	061-061	061-061	066-066	170-170	229-229	227-227
LEM193	068-068	062-064	064-064	060-061	061-061	066-066	170-170	229-229	227-227
LEM194	068-068	062-064	064-064	061-061	061-061	066-066	170-170	229-229	227-227
LEM195	068-068	062-062	064-064	060-060	061-061	066-066	170-170	229-229	227-227
LEM2577	068-068	064-064	064-064	060-060	061-061	066-066	170-170	229-229	227-227
LEM4390	068-068	064-064	064-064	060-061	061-067	066-066	170-170	229-229	227-227
LEM4741	068-068	064-064	064-064	060-060	061-061	066-066	170-170	229-229	227-227
LEM4788	068-068	064-064	062-062	060-060	061-061	066-066	170-170	229-229	227-227
LEM4878	068-068	064-064	062-062	060-060	061-061	066-066	170-170	227-227	227-227
LEM4982	068-068	058-062	064-064	061-061	061-061	066-066	170-170	229-229	227-227
LEM5420	068-068	064-064	064-064	061-061	061-061	066-066	170-170	229-229	227-227
LEM5880	068-068	060-060	062-062	061-061	061-061	066-066	170-170	229-229	227-229
LEM6172	068-068	060-060	064-064	061-061	061-061	066-066	170-170	227-227	227-229
LEM6173	068-068	060-060	062-062	061-061	061-061	066-066	170-170	229-229	227-229
LEM6174	068-068	060-060	062-062	061-061	061-061	066-066	170-170	229-229	227-229
LEM6175	068-068	060-060	064-064	061-061	061-061	066-066	170-170	229-229	227-229
LEM6176	068-068	060-060	064-064	061-061	061-061	066-066	170-170	229-229	227-229
LEM6177	068-068	064-064	064-064	061-061	061-061	066-066	170-170	229-229	227-229
LEM6226	068-068	060-062	064-064	061-061	061-061	066-066	170-170	229-229	227-227
LEM6227	068-068	062-062	062-062	060-060	061-061	066-066	170-170	229-229	227-227
LEM6228	068-068	060-064	062-062	060-061	061-061	066-066	170-170	227-227	227-227
LEM6229	068-068	060-064	062-064	060-060	061-061	066-066	170-170	229-229	227-227
LEM6230	068-068	062-062	064-064	060-060	061-061	066-066	170-170	229-229	227-227
LEM6231	068-068	062-064	062-062	060-060	061-061	066-066	170-170	229-229	227-227
LEM95	068-068	062-064	064-064	061-061	061-061	066-066	170-170	229-229	227-227
LEM6423	068-068	062-062	064-064	060-060	061-061	066-066	170-170	229-229	227-227
M118	068-068	064-064	062-062	060-060	061-061	066-066	170-170	229-229	227-229
M136	068-068	064-064	062-064	060-060	061-061	066-066	170-170	229-229	227-229
M18	068-068	064-064	064-064	060-060	061-061	066-066	170-170	229-229	227-227
M180	068-068	064-064	062-062	060-060	061-061	066-066	170-170	229-229	227-227
M187	068-068	064-064	052-052	060-060	061-061	066-066	170-170	229-229	227-227
M200	068-068	066-066	062-064	060-060	061-061	066-066	170-170	227-227	227-227
M208	068-068	064-064	062-064	060-060	061-061	066-066	170-170	227-227	227-229
M32	068-068	064-064	062-064	060-060	067-067	060-066	170-170	227-227	227-229
M33	068-068	064-064	062-064	061-061	061-061	066-066	170-170	227-227	227-229
G436	068-068	064-064	062-062	060-060	061-061	066-066	170-170	229-229	227-227
M54	068-068	064-064	062-062	060-060	061-061	066-066	170-170	229-229	227-227
M59	068-068	064-064	062-062	060-060	061-061	066-066	170-170	229-229	227-227
M62	068-068	064-064	062-062	060-060	061-061	066-066	170-170	229-229	227-227
M76	068-068	064-064	062-062	060-060	061-061	066-066	170-170	229-229	227-229
M78	068-068	064-064	062-062	060-060	061-061	066-066	170-170	229-229	227-227
G2034	068-068	064-064	062-062	060-060	061-061	066-066	170-170	229-229	227-227
G2288	068-068	064-064	062-062	060-060	061-061	066-066	170-170	229-229	227-227
G2407	068-068	064-064	062-062	060-060	061-061	066-066	170-170	229-229	227-227
G2434	068-068	064-064	062-062	060-060	061-061	066-066	170-170	229-229	227-227
G2438	068-068	060-060	062-062	060-060	061-061	066-066	170-170	229-229	227-227
G2482	068-068	060-060	062-062	060-060	061-061	066-066	170-170	229-229	227-227
G2939	068-068	064-064	062-062	060-060	067-067	066-066	170-170	229-229	227-227
G3473	068-068	064-064	062-062	060-060	061-061	066-066	170-170	229-229	227-227
G3609	068-068	064-064	062-062	060-060	061-061	066-066	170-170	229-229	227-227
Gondi2	068-068	064-064	064-064	061-061	061-061	066-066	170-170	229-229	227-227
Gondi4	068-068	064-064	064-064	061-061	061-061	066-066	170-170	229-229	227-227
Phléb	068-068	064-064	062-062	060-060	061-061	066-066	170-170	229-229	227-227
LEM4989	068-068	064-064	062-062	060-060	064-064	066-066	170-170	229-229	227-227
LEM4995	068-068	064-064	062-062	060-060	064-064	066-066	170-170	229-229	227-227
LEM6404	068-068	064-064	064-064	060-060	061-061	066-066	170-170	229-229	227-227
LEM6416	068-068	064-064	064-064	060-060	061-061	066-066	170-170	227-227	227-227
LEM6418	068-068	064-064	064-064	060-060	061-061	066-066	170-170	229-229	227-227
LEM6420	068-068	064-064	062-062	060-060	061-061	066-066	170-170	229-229	227-227
LEM6421	068-068	064-064	064-064	060-060	061-061	066-066	170-170	229-229	227-227
LEM1314	068-068	062-062	064-064	060-060	067-067	066-066	176-176	235-235	229-229
LEM1452	064-064	060-060	062-062	061-061	064-064	063-063	170-170	229-229	225-225
LEM1591	068-068	062-062	064-064	060-060	067-067	060-060	176-176	235-235	229-229
LEM1610	068-068	062-062	064-064	060-060	067-067	060-060	176-176	235-235	229-229
LEM1621	068-068	062-062	064-064	060-060	067-067	060-060	176-176	235-235	229-233
LEM1622	068-068	062-062	064-064	060-060	067-067	060-060	176-176	235-235	229-229
LEM1623	068-068	064-064	064-064	060-060	067-067	060-060	176-176	235-235	229-229
LEM1624	068-068	064-064	062-062	060-060	067-067	060-060	176-176	235-235	229-229
LEM1663	068-068	060-060	064-064	060-061	061-067	060-060	176-176	235-235	229-233
LEM1665	068-068	060-060	064-064	060-060	067-067	060-060	176-176	227-227	229-233
LEM1666	068-068	062-062	064-064	060-061	067-067	060-060	176-176	235-235	229-229
LEM1670	068-068	060-060	064-064	061-061	067-067	060-060	176-176	235-235	229-233
LEM1777	068-068	062-064	064-064	060-060	061-067	060-060	170-176	229-235	227-229
LEM1778	068-068	062-064	064-064	060-060	061-067	066-066	170-176	229-235	227-229
LEM1779	068-068	064-064	064-064	061-061	061-067	063-063	170-176	229-235	227-229
LEM1780	068-068	062-062	064-064	060-060	067-067	060-060	176-176	235-235	229-229
LEM1781	068-068	062-062	064-064	060-060	067-067	060-060	176-176	235-235	229-233
LEM1782	068-068	062-062	064-064	060-060	067-067	060-060	176-176	233-233	229-233
LEM2010	068-068	062-064	064-064	060-061	061-067	060-066	170-176	229-235	227-229
LEM2011	068-068	062-064	064-064	060-061	061-067	060-066	170-176	229-235	227-229
LEM2012	068-068	062-064	064-064	060-060	061-067	060-066	170-176	229-235	227-229
LEM2013	068-068	064-064	062-062	060-060	061-067	060-060	176-176	235-235	229-233
LEM2014	068-068	062-062	064-064	060-060	067-067	060-060	176-176	235-235	229-233
LEM2015	068-068	062-062	062-062	060-060	061-067	060-060	176-176	235-235	229-233
LEM2016	068-068	062-062	064-064	060-061	067-067	060-060	176-176	235-235	229-233
LEM2017	068-068	062-062	062-062	060-061	067-067	060-060	176-176	235-235	229-233
LEM2018	068-068	062-062	064-064	060-060	067-067	060-060	176-176	235-235	229-233
LEM2019	068-068	062-062	064-064	060-060	067-067	060-060	176-176	235-235	229-233
LEM2020	068-068	062-062	064-064	060-060	067-067	060-060	176-176	235-235	229-233
LEM2021	068-068	062-062	064-064	060-061	067-067	060-060	176-176	235-235	229-229
LEM2022	068-068	062-062	064-064	061-061	067-067	060-060	176-176	235-235	229-233
LEM2027	068-068	062-062	064-064	061-061	067-067	060-060	176-176	235-235	229-229
LEM3015	064-068	060-062	062-064	060-061	064-067	060-063	170-176	229-235	225225
LEM3856	068-068	060-060	064-064	061-061	067-067	060-060	176-176	235-235	229-229
LEM3857	068-068	062-062	062-062	061-061	067-067	060-060	176-176	235-235	229-229
LEM3859	068-068	062-062	062-062	061-061	067-067	060-060	176-176	235-235	229-229
LEM3876	068-068	060-060	062-062	061-061	067-067	060-060	176-176	235-235	229-229
LEM3913	068-068	060-060	064-064	061-061	067-067	060-060	176-176	235-235	229-229
LEM3914	068-068	062-062	064-064	061-061	067-067	060-060	176-176	235-235	229-229
LEM3915	068-068	064-064	064-064	061-061	067-067	060-060	170-170	235-235	229-229
LEM5274	068-068	060-060	062-062	061-061	067-067	060-060	176-176	235-235	229-229
LEM5275	068-068	060-060	062-062	061-061	067-067	060-060	176-176	235-235	229-229
LEM5276	068-068	060-060	064-064	061-061	067-067	060-060	176-176	235-235	229-229
LEM5277	068-068	062-064	064-064	061-061	061-067	060-066	170-176	229-235	227-229
LEM5278	068-068	064-064	064-064	060-060	061-067	060-066	170-176	229-233	227-229
LEM5279	068-068	064-064	064-064	060-060	061-067	060-066	170-176	229-233	227-229
LEM5281	068-068	064-064	064-064	060-060	061-067	060-066	170-176	229-233	227-229
LEM5283	068-068	064-064	064-064	060-060	061-067	060-066	170-176	235-235	227-229
LEM5290	068-068	062-064	064-064	061-061	061-067	060-066	170-176	235-235	227-229
LEM5291	068-068	062-064	064-064	061-061	061-067	060-066	170-176	235-235	227-229
LEM5295	068-068	060-060	064-064	061-061	061-067	060-066	170-176	227-233	227-229
LEM5497	068-068	060-060	064-064	061-061	067-067	060-060	176-176	235-235	229-229
LEM5498	068-068	064-064	064-064	060-060	067-067	060-060	176-176	235-235	229-229
LEM5499	068-068	060-060	064-064	061-061	067-067	060-060	176-176	235-235	229-229
LEM5500	068-068	060-062	064-064	061-061	067-067	060-060	176-176	235-235	229-229
LEM5501	068-068	060-060	064-064	061-061	067-067	060-060	176-176	235-235	229-229
LEM5502	068-068	060-062	064-064	061-061	067-067	060-060	176-176	235-235	229-229
LEM5503	068-068	060-062	064-064	061-061	067-067	060-060	176-176	235-235	229-229
LEM5504	068-068	062-062	064-064	061-061	067-067	060-060	176-176	235-235	229-229
LEM5505	068-068	062-062	064-064	061-061	067-067	060-060	176-176	235-235	229-229
LEM5506	068-068	062-062	064-064	061-061	067-067	060-060	176-176	235-235	229-229
LEM5950	064-064	060-060	062-062	060-060	064-064	063-063	170-170	229-229	225-225
LEM1467	068-068	064-064	062-062	060-060	067-067	060-060	176-176	229-229	229-229
LEM1595	068-068	060-060	062-062	060-060	067-067	060-060	176-176	235-235	229-229
LEM1596	068-068	060-064	062-062	060-060	067-067	060-060	176-176	235-235	229-229
LEM1597	068-068	060-060	062-062	060-060	067-067	060-060	176-176	235-235	229-229
LEM1598	068-068	060-060	062-062	060-060	067-067	060-060	176-176	235-235	229-229
LEM1601	068-068	060-060	062-062	060-060	067-067	060-060	176-176	235-235	229-229
LEM1602	068-068	060-060	062-062	060-060	067-067	060-060	176-176	231-231	229-229
LEM1604	068-068	060-060	062-062	060-060	067-067	060-060	176-176	235-235	233-233
LEM1605	068-068	060-064	062-062	060-060	067-067	060-060	176-176	235-235	233-233
LEM1606	068-068	060-064	062-062	060-060	064-067	060-060	176-176	235-235	229-229
LEM1609	068-068	064-064	062-062	060-060	067-067	060-060	176-176	235-235	229-229
LEM1611	068-068	060-060	062-062	060-060	067-067	060-060	176-176	229-229	229-229
LEM1612	068-068	060-060	062-062	060-060	067-067	060-060	176-176	231-231	229-229
LEM1613	064-064	064-064	062-062	061-061	064-064	063-063	176-176	229-229	225-225
LEM1619	068-068	064-064	062-062	060-060	064-067	060-060	176-176	235-235	229-233
LEM1620	068-068	064-064	062-062	060-060	067-067	060-060	176-176	235-235	229-233
LEM1627	068-068	064-064	062-062	060-060	067-067	060-060	176-176	235-235	229-229
LEM1667	064-064	064-064	062-062	060-060	064-064	060-060	176-176	229-229	225-225
LEM1689	068-068	064-064	062-062	060-060	067-067	060-060	176-176	231-231	229-229
LEM2142	068-068	064-064	062-062	060-060	061-061	060-060	176-176	235-235	229-229
LEM2144	068-068	064-064	062-062	060-060	061-061	060-060	176-176	235-235	229-229
LEM2145	068-068	064-064	062-062	060-060	061-061	060-060	176-176	235-235	229-229
LEM2146	068-068	064-064	062-062	060-060	061-061	060-060	176-176	235-235	229-229
LEM2152	068-068	064-064	062-062	060-060	067-067	060-060	176-176	235-235	229-229
LEM2156	064-064	064-064	062-062	061-061	064-064	063-063	176-176	235-235	229-229
LEM2159	068-068	064-064	062-062	060-060	061-061	060-060	170-170	235-235	229-229
LEM2450	068-068	064-064	062-062	060-060	067-067	060-060	176-176	233-233	233-233
LEM2571	068-068	064-064	062-062	060-060	067-067	060-060	176-176	233-233	229-229
LEM3858	068-068	064-064	062-062	060-060	067-067	060-060	176-176	233-233	229-229
LEM3916	068-068	064-064	062-062	060-060	067-067	060-060	176-176	233-233	229-229
LEM5738	068-068	064-064	062-062	060-060	067-067	060-060	170-176	229-235	225-229
LEM5739	064-064	064-064	062-062	060-060	064-064	063-063	170-170	235-235	225-225
LEM5740	068-068	064-064	062-064	060-060	067-067	060-060	170-176	235-235	225-229
LEM5742	064-068	064-064	062-062	060-060	064-064	060-060	176-176	235-235	229-229
LEM5743	068-068	064-064	062-062	060-060	067-067	060-060	176-176	235-235	229-229
LEM5941	064-064	064-064	062-062	060-060	067-067	063-063	170-170	235-235	229-229
LEM5945	068-068	064-064	062-062	060-060	061-061	060-066	170-170	235-235	229-229
LEM1462	068-068	064-064	062-062	061-061	067-067	060-060	176-176	235-235	229-229
LEM1463	068-068	064-064	062-062	061-061	061-067	060-060	176-176	233-233	229-229
LEM1464	068-068	062-062	062-062	061-061	064-067	060-060	176-176	235-235	229-229
LEM1465	068-068	062-062	062-062	060-060	067-067	060-060	176-176	235-235	229-233
LEM1466	068-068	062-062	062-062	060-060	067-067	060-060	176-176	235-235	229-233
LEM1468	064-068	062-062	062-062	061-061	061-067	060-060	176-176	235-235	229-233
LEM1696	068-068	062-062	062-062	061-061	064-067	060-060	176-176	235-235	229-233
LEM1930	068-068	064-064	064-064	061-061	064-067	060-060	176-176	235-235	229-233
LEM2143	068-068	062-062	062-062	061-061	067-067	060-060	176-176	235-235	229-229
LEM3186	068-068	062-062	062-062	061-061	061-067	060-066	170-176	229-235	227-229
LEM5280	064-064	062-062	064-064	061-061	061-067	063-063	170-176	229-235	227-229
LEM5507	068-068	064-064	062-062	061-061	067-067	060-060	176-176	235-235	229-229
LEM5508	064-064	062-062	062-062	061-061	061-067	060-060	176-176	235-235	229-229
LEM5741	068-068	062-062	062-062	061-061	067-067	060-060	176-176	235-235	229-229
